# Supplementary material for: Heterogeneous synthesis and electrochemical performance of LiMnPO4/C composites as cathode materials of lithium ion batteries
Source: Royal Society of Chemistry journal article supplement (doi:10.1039/d0ra08274k), 2020-01-01
Supplement: d0ra08274k1.pdf [file d0ra08274k1.pdf]

# Heterogeneous Synthesis and Electrochemical Performance of LiMnPO<sub>4</sub>/C Composites as Cathode Materials for Lithium Ion Batteries

Ju-Gong Zheng, <sup>\*a</sup> Guang-Yuan Ren,<sup>a</sup> Jun Shi,<sup>a</sup> Ting Yang,<sup>\*a</sup> Yue-Feng Tang<sup>b</sup> and Yan-Feng Chen<sup>b</sup>

<sup>a</sup> *Fundamental Science on Radioactive Geology and Exploration Technology Laboratory, East*

*China university of Technology, 418 Guanglan Avenue, Nanchang, Jiangxi, 330013, China.*

<sup>b</sup> *National Laboratory of Solid State Microstructures, Nanjing University, 22 Hankou Road, Nanjing 210093, China.*

## Supporting Information I

The electrode slurry was developed by mixing LiMnPO<sub>4</sub> or LiMnPO<sub>4</sub>/C, super P carbon black and polyvinylidene fluoride binder (Solef) at a weight ratio of 75:10:15 in N-methyl-2-pyrrolidone (NMP). The acquired slurry was uniformly cast onto aluminum foil, and dried at 120 °C in a vacuum oven to yield the working electrode. CR2032- type coin cells composed of a working electrode, a Li foil counter electrode, a Celgard 2300 membrane separator and an electrolyte (1 mol L<sup>-1</sup> LiPF<sub>6</sub> in ethylene carbonate (EC) and dimethyl carbonate (DMC) (v/v = 1:1) were prepared in a Ar-filled glove box (MBRAUN, Germany).

## Supporting Information II

As show in figure S1, the curves show weight loss process consists of three stages. The first stage is from room temperature to about 200 °C. The second stage appears from 200 °C to 400 °C. The second stage appears from 400 °C to 600 °C. The third stage shows endothermic peak around 500 °C, which is corresponding to the formation of the crystalline phase of LiMnPO<sub>4</sub><sup>1, 2</sup>. There is almost no weight loss when the temperature was above 600 °C, which indicated the crystallization

\* East China University of Technology, Nanchang 330013, China, Tel.: (86)-0791-83896550, Fax: (86)-0791-83896550  
E-mail: ecutjgzheng@126.com.

for the  $\text{LiMnPO}_4$  composite materials.

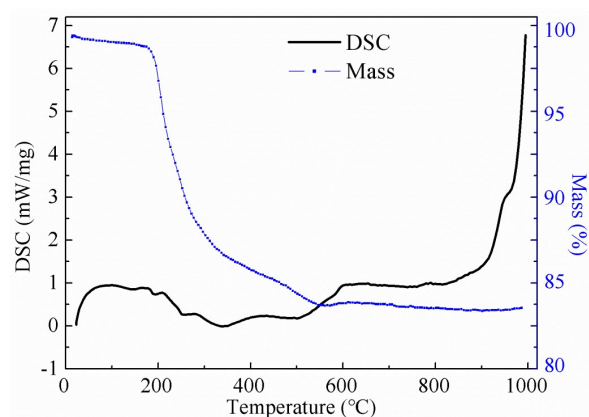

Figure S1 TG-DSC curves of the precursor

### Supporting Information III

FT-IR absorption spectra of the as-synthesized samples are shown in figure S2.  $\text{PO}_4$  groups revealed by characteristic absorption peaks at  $546.5\text{ cm}^{-1}$  due to P-O bending vibration and 636, 976.6 and  $1089.5\text{ cm}^{-1}$  owing to P-O stretching vibration. Characteristic absorption peaks at  $1738.6\text{ cm}^{-1}$  was attributable to the benzene ring stretching vibration. All complexes characteristic absorptions present a broad band at ca.  $2500\text{--}3500\text{ cm}^{-1}$ , the broad band centered at  $3000\text{ cm}^{-1}$  was assigned to the C-H group and disappeared in calcined product owing to deprotonation<sup>3,4</sup>.

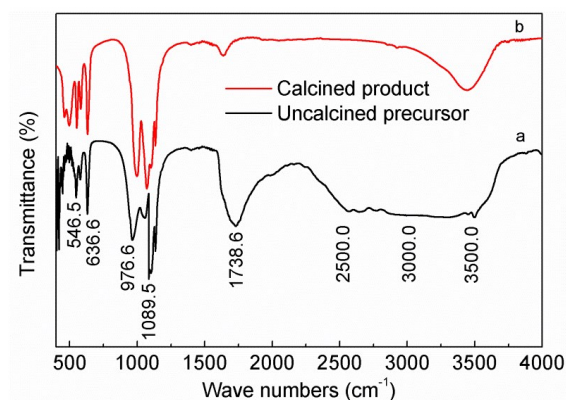

Figure S2 FT-IR absorption spectra of the samples prepared via homogeneous nucleation. (a) FT-IR absorption spectrum of the precursor achieved by the hydrothermal reaction, (b) FT-IR absorption spectrum of the product obtained from calcined precursor sample.

### References

1. B. Rong, Y. Lu, X. Liu, Q. Chen, K. Tang, H. Yang, X. Wu, F. Shen, Y. Chen, Y. Tang and Y. Chen,

*Nano Energy*, 2014, **6**, 173-179.

2. J. Zheng, L. Ni, Y. Lu, C. Qin, P. Liu, T. Wu, Y. Tang and Y. Chen, *Journal of Power Sources*, 2015, **282**, 444-451.
3. F. Aman, M. Hanif, M. Kubanik, A. Ashraf, T. Söhnle, S. M. F. Jamieson, W. A. Siddiqui and C. G. Hartinger, *Chemistry - A European Journal*, 2017, **23**, 4893-4902.
4. A. Salah, P. Jozwiak, J. Garbarczyk, K. Benkhoucha, K. Zaghbi, F. Gendron and C. Julien, *Journal of Power Sources*, 2005, **140**, 370-375.
